# Supplementary material for: Expression of ICOSL is associated with decreased survival in invasive breast cancer
Source: PeerJ journal article supplement (doi:10.7717/peerj.6903), 2019-05-16
Supplement: DatasetS1.zip [file DatasetS1.zip]

## Sheet: Raw Data Sum
Patient ID	Age	Menopausal Status	T	N	Stage	Pathological Diagnosis	Histologic Grade	HER2	ER Grade	PR Grade	ICOSL Expression in Cancerous Cell Cytoplasma	ICOSL Expression in Cancerous Cell Nucleus	ICOSL Expression on Cancerous Cell Membrane	ICOSL Expression in Paracancerous Cell Cytoplasma	ICOSL Expression in Paracancerous Cell Nucleus	ICOSL Expression on Paracancerous Cell Membrane	Status	Time (days)
		1-premenopause ; 2- menopause;				1-Ductal carcinoma; 2-Lobular carcinoma											1-survived; 0- died
1	50	1	2	1	2	1	2	0	3	0	8	2	0	0	0	0	1	81
2	35	1	1	1	2	1	2	0	3	0	2	1	0	0	0	0	1	83
3	65	2	1	1	2	1	2	0	3	0	4	4	2
4	51	2	2	2	3	1	2	0	3	0	8	8	0
5	47	1	1	0	1	1	3	0	3	0	0	2	0
6	72	2	1	1	2	1	3	0	3	0	0	0	0	0	0	0	1	81
7	48	1	1	1	2	1	2	0	3	1	12	8	0	0	0	0	1	81
8	46	1	2	1	2	2	2	0	3	1	1	2	0				1	30
9	75	2	2	1	2	1	3	0	3	1	1	1	0	0	1	0	1	66
10	46		1	2	2	1	3	0	3	1	4	3	0	2	2	0	1	82
11	71	2	2	2	3	1	3	0	3	1	12	1	8	0	0	0	0	28
12	49	1	2	0	2	1	2	0	3	2	2	2	0	8	6	0
13	50	1	2	1	2	1	2	0	3	2	0	0	0	2	1	0	1	83
14	31	1	1	1	2	1	2	0	3	2	4	4	0
15	51	1	1	1	2	1	2	0	3	2	8	0	2	2	1	0	0	55
16	54	2	1	1	2	1	2	0	3	2	0	2	0				1	81
17	56	2	1	1	2	1	2	0	3	2	1	1	0	0	0	0	1	81
18	73	2	1	1	2	1	2	0	3	2	4	4	0	4	4	0	1	82
19	60	2	1	2	2	1	2	0	3	2	12	1	1	0	0	0	1	81
20	64	2	1	2	2	1	2	0	3	2	8	6	0	0	0	0	1	81
21	61	2	2	2	3	1	2	0	3	2	0	4	0
22	41	1	1	3	3	1	2	0	3	2	4	4	0
23	64	2	2	1	2	2	2	0	3	2	0	2	0
24	53	2	2	1	2	1	3	0	3	2	6	3	0	1	1	0	1	81
25	46	1	1	1	2	2	3	0	3	2	0	1	0	0	0	0	1	81
26	63	2	2	1	2	2	1	0	3	3	8	4	0	2	0	0	1	81
27	45	1	1	0	1	1	2	0	3	3	4	4	0	0	0	0	1	31
28	82	2	2	0	2	1	2	0	3	3	4	4	0				1	30
29	44	1	2	1	2	1	2	0	3	3	8	1	0	6	0	2	1	81
30	50	1	2	1	2	1	2	0	3	3	8	4	0
31	47	1	2	2	3	1	2	0	3	3	2	2	0	0	0	0	1	82
32	42	1	2	3	3	1	2	0	3	3	4	4	0
33	53	1	1	3	3	1	2	0	3	3	8	8	0
34	56	2	1	3	3	1	2	0	3	3	8	8	0
35	77	2	3	0	2	2	2	0	3	3	4	4	0
36	71	2	2	0	2	2	2	0	3	3	4	2	0
37	43	1	1	1	2	2	2	0	3	3	6	2	2	2	2	1	1	82
38	57	2	1	1	2	2	2	0	3	3	8	8	0
39	45	1	3	1	3	2	2	0	3	3	0	3	0
40	61	2	2	3	3	2	2	0	3	3	8	4	1
41	43	1	2	1	2	1	3	0	3	3	4	1	0	8	0	3	1	81
42	53	2	3	1	3	1	3	0	3	3	4	8	0
43	46	1	1	3	3	1	3	0	3	3	4	1	6	0	0	0
44	54	2	2	0	2	1	2	0	2	0	0	1	0				1	109
45	50	1	1	1	2	1	2	0	2	0	0	1	0	1	0	0	1	82
46	38	1	1	2	2	1	2	0	2	0	0	0	0	0	0	0	1	83
47	58	2	2	1	2	1	3	0	2	0	2	2	0				1	51
48	72	2	2	3	3	1	3	0	2	0	8	1	3	0	0	0	0	3
49	40	1	1	0	1	1	2	0	2	2	0	0	0
50	40	1	2	1	2	1	2	0	2	2	4	4	0
51	73	2	1	1	2	1	2	0	2	2	0	0	0	1	0	0	0	7
52	38	1	2	2	3	1	2	0	2	2	2	2	0
53	51	1	2	3	3	2	3	0	2	2	4	4	0
54	32	1	1	0	1	1	1	0	1	0	4	4	0	0	0	0
55	58	2	1	0	1	1	1	0	1	0	0	0	0
56	50	1	2	0	2	1	1	0	1	0	0	0	0
57	45	1	1	0	1	1	2	0	1	0	0	2	0
58	51	1	1	0	1	1	2	0	1	0	0	0	0
59	58	2	1	0	1	1	2	0	1	0	0	1	0
60	62	2	1	0	1	1	2	0	1	0	4	4	0
61	45	1	2	0	2	1	2	0	1	0	4	3	0
62	66	2	2	0	2	1	2	0	1	0	4	4	0
63	56	2	2	1	2	1	2	0	1	0	12	8	0	4	2	0
64	53	2	2	1	2	1	2	0	1	0	4	0	0
65	46	1	2	2	3	1	2	0	1	0	0	2	0
66	30	1	2	3	3	1	2	0	1	0	4	4	0
67	81	2	2	3	3	1	2	0	1	0	4	4	0
68	43	1	1	0	1	1	3	0	1	0	4	8	0	2	2	0
69	46	1	1	0	1	1	3	0	1	0	0	2	0
70	56	2	1	0	1	1	3	0	1	0	4	8	0	0	0	0
71	39	1	2	0	2	1	3	0	1	0	4	2	0
72	53	1	2	0	2	1	3	0	1	0	0	0	0
73	75	2	2	2	3	1	3	0	1	0	0	1	0
74	55	2	3	3	3	1	3	0	1	0	4	3	0
75	52	2	1	0	1	1	1	0	1	0	0	0	0	0	0	0
76	80	2	2	3	3	1	1	0	1	0	4	2	0	4	2	0
77	56	2	1	0	1	1	2	0	1	0	4	3	0	0	1	0
78	56	2	1	0	1	1	2	0	1	0	8	8	0
79	58	2	1	0	1	1	2	0	1	0	2	0	0
80	59	2	1	0	1	1	2	0	1	0	2	2	0	0	0	0
81	70	2	2	1	2	1	2	0	1	0	4	8	0	0	1	0
82	48	2	1	0	1	1	3	0	1	0	0	1	0	0	1	0
83	54	2	1	0	1	1	3	0	1	0	4	4	0	4	1	0
84	56	2	1	0	1	1	3	0	1	0	4	3	0	0	0	0
85	32	1	1	0	1	1	1	0	1	1	0	0	0
86	37	1	1	0	1	1	1	0	1	1	0	0	0
87	51	1	1	0	1	1	1	0	1	1	0	0	0
88	56	2	1	0	1	1	1	0	1	1	0	0	0
89	63	2	1	0	1	1	1	0	1	1	2	3	0
90	66	2	1	0	1	1	1	0	1	1	0	3	0
91	76	2	3	0	2	1	1	0	1	1	4	1	0
92	58	2	2	0	2	1	1	0	1	1	0	0	0
93	62	2	2	0	2	1	1	0	1	1	4	4	0
94	66	2	2	0	2	1	1	0	1	1	0	1	0
95	68	2	1	1	2	1	1	0	1	1	0	0	0
96	38	1	1	3	3	1	1	0	1	1	0	2	0
97	74	2	2	0	2	2	1	0	1	1	0	0	0
98	42	1	1	0	1	1	2	0	1	1	4	4	0
99	48	1	1	0	1	1	2	0	1	1	4	4	0	0	1	0
100	50	1	1	0	1	1	2	0	1	1	0	1	0
101	52	1	1	0	1	1	2	0	1	1	0	1	0
102	53	1	1	0	1	1	2	0	1	1	4	4	0
103	53	1	1	0	1	1	2	0	1	1	0	1	0
104	50	2	1	0	1	1	2	0	1	1	4	4	0	0	0	0
105	69	2	1	0	1	1	2	0	1	1	4	0	1
106	39	1	2	0	2	1	2	0	1	1	4	4	0
107	41	1	2	0	2	1	2	0	1	1	0	4	0
108	46	1	2	0	2	1	2	0	1	1	4	3	0	0	1	0
109	47	1	2	0	2	1	2	0	1	1	0	0	0
110	51	1	2	0	2	1	2	0	1	1	4	4	0
111	52	1	2	0	2	1	2	0	1	1	4	4	0
112	53	1	2	0	2	1	2	0	1	1	4	8	0
113	56	2	2	0	2	1	2	0	1	1	2	2	0
114	58	2	2	0	2	1	2	0	1	1	0	4	0
115	59	2	2	0	2	1	2	0	1	1	0	1	0
116	63	2	2	0	2	1	2	0	1	1	4	4	0
117	64	2	2	0	2	1	2	0	1	1	0	4	0
118	80	2	2	0	2	1	2	0	1	1	0	4	0
119	53	2	2	1	2	1	2	0	1	1	8	1	0				1	82
120	57	2	2	1	2	1	2	0	1	1	8	8	0
121	55	2	1	1	2	1	2	0	1	1	4	3	0	1	1	0
122	37	1	2	1	2	1	2	0	1	1	4	2	0
123	43	1	2	1	2	1	2	0	1	1	4	2	0
124	47	1	2	1	2	1	2	0	1	1	4	4	0
125	49	1	2	1	2	1	2	0	1	1	4	4	0
126	45	1	1	1	2	1	2	0	1	1	0	2	0
127	51	2	1	1	2	1	2	0	1	1	4	4	0	0	1	0
128	33	1	2	2	3	1	2	0	1	1	0	0	0
129	38	1	2	2	3	1	2	0	1	1	0	3	0
130	41	1	2	2	3	1	2	0	1	1	0	0	0
131	46	1	2	2	3	1	2	0	1	1	4	4	0
132	50	1	1	2	3	1	2	0	1	1	2	2	0	0	0	0
133	52	1	3	3	3	1	2	0	1	1	4	3	0
134	46	1	3	1	3	1	2	0	1	1	4	4	0
135	59	2	3	1	3	1	2	0	1	1	0	4	0
136	61	2	3	1	3	1	2	0	1	1	0	0	0
137	44	1	1	0	1	2	2	0	1	1	0	0	0
138	48	1	1	1	2	2	2	0	1	1	0	0	0	0	0	0
139	78	2	1	1	2	2	2	0	1	1	0	0	0				1	34
140	42	1	1	0	1	2	2	0	1	1	0	0	0	4	4	0
141	61	2	2	0	2	1	3	0	1	1	0	4	0
142	63	2	2	1	2	1	3	0	1	1	0	1	0
143	59	2	2	3	3	1	3	0	1	1	8	8	0
144	49	1	1	1	2	2	1	0	1	1	0	2	0	0	1	0
145	47	1	1	0	1	1	2	0	1	1	2	2	0	0	0	0
146	53	2	1	0	1	1	2	0	1	1	3	3	0	0	0	0
147	57	2	1	0	1	1	2	0	1	1	2	2	0	0	3	0
148	59	2	1	0	1	1	2	0	1	1	4	2	0	0	0	0
149	60	2	1	0	1	1	2	0	1	1	4	8	0
150	61	2	1	0	1	1	2	0	1	1	0	0	0
151	70	2	1	0	1	1	2	0	1	1	0	2	0	0	0	0
152	77	2	1	0	1	1	2	0	1	1	4	2	0
153	80	2	1	0	1	1	2	0	1	1	8	8	0
154	42	1	2	0	2	1	2	0	1	1	4	2	0
155	45	1	2	0	2	1	2	0	1	1	4	3	0	4	1	0
156	52	1	2	0	2	1	2	0	1	1	4	4	0	4	6	0
157	57	2	2	0	2	1	2	0	1	1	4	3	0	0	0	0
158	58	2	2	0	2	1	2	0	1	1	8	8	0
159	78	2	2	0	2	1	2	0	1	1	2	2	0	0	0	0
160	80	2	2	0	2	1	2	0	1	1	4	4	0	0	0	0
161	48	1	2	1	2	1	2	0	1	1	4	8	0	2	2	0
162	50	2	2	1	2	1	2	0	1	1	4	3	0	0	0	0
163	46	1	1	1	2	1	2	0	1	1	12	2	4	0	0	0
164	33	1	2	1	2	1	2	0	1	1	8	4	0	8	8	0
165	37	1	1	0	1	1	3	0	1	1	4	3	0	4	3	0
166	58	2	1	0	1	1	3	0	1	1	8	4	0
167	47	1	3	0	2	1	3	0	1	1	4	3	0	0	0	0
168	50	1	2	0	2	1	3	0	1	1	3	2	0	0	2	0
169	54	1	2	0	2	1	3	0	1	1	12	8	0	4	8	0
170	74	2	2	0	2	1	3	0	1	1	4	4	0	0	2	0
171	76	2	2	0	2	1	3	0	1	1	6	6	0
172	66	2	2	1	2	1	3	0	1	1	4	4	0	0	0	0
173	42	1	2	2	3	1	3	0	1	1	8	4	0	0	2	0
174	42	1	1	2	3	1	3	0	1	1	1	1	0	3	3	0
175	74	2	1	0	1	1	1	0	0	0	4	0	0	4	1	0	1	75
176	50	1	1	0	1	1	2	0	0	0	12	2	8	0	0	0
177	50	1	1	0	1	1	2	0	0	0	0	0	0	0	0	0	1	86
178	72	2	1	0	1	1	2	0	0	0	4	1	0				1	108
179	48	2			1	1	2	0	0	0	4	2	0
180	51	2			1	1	2	0	0	0	4	2	0	2	2	0
181	59	2	3	0	2	1	2	0	0	0	4	4	0
182	34	1	2	0	2	1	2	0	0	0	4	1	0				1	108
183	35	1	2	0	2	1	2	0	0	0	0	0	0
184	42	1	2	0	2	1	2	0	0	0	0	0	0
185	44	1	2	0	2	1	2	0	0	0	4	4	0
186	46	1	2	0	2	1	2	0	0	0	4	2	0
187	48	1	2	0	2	1	2	0	0	0	12	0	12	4	1	2	0	30
188	54	2	2	0	2	1	2	0	0	0	4	2	0				1	112
189	58	2	2	0	2	1	2	0	0	0	0	0	0
190	70	2	2	0	2	1	2	0	0	0	0	1	0				1	81
191	77	2	2	0	2	1	2	0	0	0	0	0	0				0	39
192	78	2	2	0	2	1	2	0	0	0	0	3	0
193	40	1	2	1	2	1	2	0	0	0	4	8	0
194	46	1	2	1	2	1	2	0	0	0	4	4	0
195	47	1	2	1	2	1	2	0	0	0	4	0	0				1	43
196	48	1	2	1	2	1	2	0	0	0	8	0	2
197	52	1	2	1	2	1	2	0	0	0	4	4	0				1	30
198	52	2	2	1	2	1	2	0	0	0	4	3	0
199	54	2	2	1	2	1	2	0	0	0	4	2	0	2	4	2
200	57	2	2	1	2	1	2	0	0	0	4	4	0
201	61	2	2	1	2	1	2	0	0	0	4	4	0	0	2	0
202	63	2	2	1	2	1	2	0	0	0	0	0	0	8	2	2	0	52
203	67	2	2	1	2	1	2	0	0	0	0	0	0				1	31
204	84	2	2	1	2	1	2	0	0	0	2	1	0	0	0	0	1	82
205	38	1	1	1	2	1	2	0	0	0	4	3	0
206	50	1	1	1	2	1	2	0	0	0	4	3	0	2	2	0
207	50	1	1	1	2	1	2	0	0	0	0	0	0	1	0	0	1	82
208	51	1	1	1	2	1	2	0	0	0	0	1	0				1	40
209	52	2	1	1	2	1	2	0	0	0	0	1	0	0	0	0	1	40
210	54	2	1	1	2	1	2	0	0	0	0	2	0	0	1	0	1	55
211	56	2	1	1	2	1	2	0	0	0	4	0	0	0	0	0
212	60	2	1	1	2	1	2	0	0	0	2	2	0
213	62	2	1	1	2	1	2	0	0	0	4	1	0	0	1	0	1	41
214	66	2	1	1	2	1	2	0	0	0	4	1	0				1	31
215	52	2	1	2	2	1	2	0	0	0	6	1	0	0	0	0	1	82
216	68	2	1	2	2	1	2	0	0	0	4	3	0	0	0	0	1	82
217	55	1	2	1	2	1	2	0	0	0	0	1	0
218	75	2	2	1	3	1	2	0	0	0	8	0	1				0	49
219	71	2	2	2	3	1	2	0	0	0	0	4	0
220	57	2	2	3	3	1	2	0	0	0	2	1	0
221	52	1	1	4	3	1	2	0	0	0	4	4	0
222	45	1	1	0	1	2	2	0	0	0	12	3	9
223	52	2	2	0	2	2	2	0	0	0	2	0	0				1	88
224	43	1	2	1	2	2	2	0	0	0	0	2	0	1	1	0
225	46	1	2	1	2	2	2	0	0	0	0	0	0
226	47	1	2	1	2	2	2	0	0	0	0	0	0	0	0	0	1	81
227	50	1	1	1	2	2	2	0	0	0	0	0	0
228	57	2	1	1	2	2	2	0	0	0	4	0	0	0	1	0
229	40	1	1	0	1	1	3	0	0	0	0	3	0
230	53	1	1	0	1	1	3	0	0	0	0	4	0
231	53	1	1	0	1	1	3	0	0	0	0	0	0
232	54	2	1	0	1	1	3	0	0	0	8	8	0
233	56	2	1	0	1	1	3	0	0	0	4	3	0
234	56	2	1	0	1	1	3	0	0	0	0	0	0
235	57	2	1	0	1	1	3	0	0	0	2	0	0				1	81
236	61	2	1	0	1	1	3	0	0	0	0	0	0
237	71	2	1	0	1	1	3	0	0	0	4	1	0				1	74
238	71	2	1	0	1	1	3	0	0	0	12	0	0				0	42
239	35	1	3	0	2	1	3	0	0	0	0	2	0
240	41	1	2	0	2	1	3	0	0	0	4	1	0	3	1	0	1	75
241	47	1	2	0	2	1	3	0	0	0	0	0	0	1	1	0	1	105
242	48	1	2	0	2	1	3	0	0	0	0	0	0	0	0	0	1	115
243	50	1	2	0	2	1	3	0	0	0	8	4	0
244	51	1	2	0	2	1	3	0	0	0	1	0	0	8	4	2	0	27
245	52	1	2	0	2	1	3	0	0	0	0	2	0	1	1	0
246	53	1	2	0	2	1	3	0	0	0	4	4	0
247	53	1	2	0	2	1	3	0	0	0	0	0	0
248	58	2	2	0	2	1	3	0	0	0	1	0	0
249	62	2	2	0	2	1	3	0	0	0	4	4	0
250	65	2	2	0	2	1	3	0	0	0	4	3	0
251	70	2	2	0	2	1	3	0	0	0	8	0	4				0	55
252	41	1	2	1	2	1	3	0	0	0	4	4	0
253	42	1	2	1	2	1	3	0	0	0	8	3	0	6	0	2	1	82
254	54	2	2	1	2	1	3	0	0	0	4	0	0	0	1	0	1	48
255	63	2	2	1	2	1	3	0	0	0	0	2	0
256	75	2	2	1	2	1	3	0	0	0	0	0	0				1	56
257	77	2	2	1	2	1	3	0	0	0	8	2	4
258	31	1	1	1	2	1	3	0	0	0	4	4	0
259	45	1	1	1	2	1	3	0	0	0	6	2	0	2	0	0	1	81
260	57	2	1	2	2	1	3	0	0	0	4	2	0
261	43	1	2	1	2	1	3	0	0	0	0	0	0
262	45	1	2	1	2	1	3	0	0	0	0	1	0
263	56	2	2	1	2	1	3	0	0	0	0	3	0
264	33	1	1	1	2	1	3	0	0	0	0	1	0
265	42	1	1	1	2	1	3	0	0	0	0	0	0
266	50	1	1	1	2	1	3	0	0	0	0	4	0
267	51	1	3	2	3	1	3	0	0	0	8	8	0
268	38	1	2	2	3	1	3	0	0	0	0	0	0
269	45	1	2	2	3	1	3	0	0	0	4	4	0				1	32
270	58	2	2	2	3	1	3	0	0	0	0	2	0
271	53	2	3	3	3	1	3	0	0	0	1	2	0	1	1	0	0	5
272	75	2	3	3	3	1	3	0	0	0	2	2	0
273	53	2	2	3	3	1	3	0	0	0	4	2	0				0	21
274	30	1	3	1	3	1	3	0	0	0	0	1	0
275	49	1	2	0	2	2	3	0	0	0	4	0	0				1	34
276	53	2	2	0	2	2	3	0	0	0	12	0	0				0	12
277	57	2	2	0	2	2	3	0	0	0	0	2	0				1	88
278	48	1	1	0	1	1	2	0	0	0	4	3	0	0	2	0
279	56	2	1	0	1	1	2	0	0	0	8	8	0	0	1	0
280	63	2	1	0	1	1	2	0	0	0	8	1	0	0	0	0
281	70	2	1	0	1	1	2	0	0	0	0	0	0	1	0	0
282	38	1	3	0	2	1	2	0	0	0	4	3	0
283	53	2	2	0	2	1	2	0	0	0	0	0	0	0	0	0
284	40	1	1	1	2	1	2	0	0	0	4	4	0	0	3	0
285	40	1	1	0	1	1	3	0	0	0	4	3	0	0	0	0
286	54	2	1	0	1	1	3	0	0	0	12	4	6
287	55	2	1	0	1	1	3	0	0	0	0	0	0	0	0	0
288	55	2	1	0	1	1	3	0	0	0	8	3	0
289	50	1	2	0	2	1	3	0	0	0	8	4	0	0	0	0
290	53	2	2	1	2	1	3	0	0	0	8	4	0	0	2	0
291	65	2	2	1	2	1	3	0	0	0	8	8	0	0	0	0
292	35	1	2	1	2	1	3	0	0	0	4	4	0	4	4	0
293	48	2	1	1	2	1	3	0	0	0	8	1	0	8	2	0
294	50	1	2	3	3	1	3	0	0	0	2	2	0	4	3	0
295	41	1	1	0	1	2	3	0	0	1	0	3	0
296	52	2	1	2	3	1	2	0	0	1	4	4	0	0	0	0
297	53	2	2	1	2	1	2	1	3	0	4	1	0	0	0	0	1	82
298	69	2	2	1	2	1	2	1	3	0	4	8	0
299	67	2	1	1	2	1	2	1	3	0	12	4	4				1	31
300	45	1	1	2	2	1	2	1	3	0	8	4	1
301	46	1	2	2	3	1	2	1	3	0	4	3	0
302	55	2	2	2	3	1	2	1	3	0	8	8	0
303	61	2	2	2	3	1	2	1	3	0	4	2	0	0	0	0	0	82
304	61	2	2	2	3	1	2	1	3	0	0	2	0
305	65	2	2	3	3	1	2	1	3	0	0	4	0
306	74	2	2	3	3	1	2	1	3	0	0	3	0
307	67	2	1	1	2	2	3	1	3	0	4	3	0				1	31
308	53	1	2	1	2	1	2	1	3	1	4	2	0	1	1	0	1	82
309	51	1	2	1	2	1	2	1	3	2	4	4	0				1	31
310	62	2	2	1	2	1	2	1	3	2	4	4	0
311	54	2	1	1	2	1	2	1	3	2	4	3	0
312	49	1	1	2	2	1	2	1	3	2	8	4	0
313	62	2	1	2	2	1	2	1	3	2	4	4	0
314	71	2	1	2	2	1	2	1	3	2	0	1	0
315	35	1	2	0	2	1	3	1	3	2	4	4	0	2	2	0
316	49	1	2	1	2	1	2	1	3	3	8	4	0	0	0	0	1	81
317	55	2	2	1	2	1	2	1	3	3	8	4	0				1	30
318	57	2	2	1	2	1	2	1	3	3	4	4	0
319	68	2	2	1	2	1	2	1	3	3	4	4	0
320	31	1	1	1	2	1	2	1	3	3	8	4	0
321	36	1	1	2	2	1	2	1	3	3	4	4	0
322	50	1	1	2	2	1	2	1	3	3	4	4	2
323	52	2	3	1	3	1	2	1	3	3	4	4	0
324	78	2	3	3	3	1	2	1	3	3	8	3	0
325	73	2	1	0	1	2	2	1	3	3	0	0	0
326	47	1	2	0	2	2	2	1	3	3	0	4	0
327	50	1	1	1	2	2	2	1	3	3	0	2	0	0	0	0	1	81
328	46	1	2	2	3	1	3	1	3	3	1	2	0	0	0	0	1	83
329	41	1	3	3	3	1	3	1	3	3	0	4	0
330	54	2	2	1	2	1	2	1	2	0	0	0	0
331	56	2	2	1	2	1	2	1	2	0	8	4	0
332	57	2	1	1	2	1	2	1	2	0	0	6	0
333	53	2	2	2	3	1	2	1	2	0	8	4	2
334	61	2	1	2	2	1	2	1	2	2	0	0	0
335	50	1	1	0	1	1	2	1	1	0	4	2	0
336	52	1	1	0	1	1	2	1	1	0	1	0	0	4	2	0	1	50
337	54	2	1	0	1	1	2	1	1	0	0	2	0
338	53	1	2	0	2	1	2	1	1	0	0	4	0
339	57	2	2	1	2	1	2	1	1	0	4	4	0
340	42	1	2	0	2	1	3	1	1	0	0	3	0
341	46	1	2	0	2	1	3	1	1	0	0	3	0
342	58	2	1	3	3	1	3	1	1	0	2	3	0
343	53	2	2	3	3	1	3	1	1	0	4	3	0
344	38	1	1	0	1	1	2	1	1	1	0	4	0
345	48	1	1	0	1	1	2	1	1	1	0	4	0
346	57	2	1	0	1	1	2	1	1	1	4	4	0
347	44	1	2	0	2	1	2	1	1	1	4	0	0
348	52	1	2	0	2	1	2	1	1	1	0	0	0
349	56	2	2	0	2	1	2	1	1	1	8	2	4	0	0	0
350	61	2	1	1	2	1	2	1	1	1	8	4	0
351	40	1	2	1	2	1	2	1	1	1	8	2	0
352	43	1	2	1	2	1	2	1	1	1	0	8	0
353	65	2	2	1	2	1	2	1	1	1	4	4	0
354	79	2	2	1	2	1	2	1	1	1	0	2	0
355	71	2	1	1	2	1	2	1	1	1	8	4	0	4	8	2
356	63	2	3	1	3	1	2	1	1	1	0	0	0
357	47	1	3	2	3	1	2	1	1	1	0	4	0
358	46	1	2	2	3	1	2	1	1	1	4	4	0
359	63	2	2	2	3	1	2	1	1	1	0	0	0
360	77	2	2	3	3	1	2	1	1	1	4	3	0
361	41	1	2	1	2	2	2	1	1	1	0	0	0
362	59	2	2	1	2	2	2	1	1	1	0	0	0
363	55	2	2	2	3	2	2	1	1	1	0	0	0
364	42	1	2	2	3	1	3	1	1	1	0	4	0
365	35	1	1	2	3	1	3	1	1	1	3	2	0
366	46	1	3	3	3	1	3	1	1	1	0	0	0	0	0	0
367	33	1	2	3	3	1	3	1	1	1	4	0	1
368	40	1	2	3	3	1	3	1	1	1	4	3	0
369	47	1	1	0	1	1	2	1	0	0	4	0	4	8	2	3	0	73
370	56	2	1	0	1	1	2	1	0	0	4	4	0
371	65	2	1	0	1	1	2	1	0	0	8	2	0
372	47	1	2	0	2	1	2	1	0	0	0	2	0
373	54	2	2	0	2	1	2	1	0	0	8	8	8
374	55	2	2	0	2	1	2	1	0	0	4	4	0
375	55	2	2	0	2	1	2	1	0	0	4	3	0
376	58	2	2	0	2	1	2	1	0	0	4	2	0
377	76	2	2	0	2	1	2	1	0	0	0	4	0
378	59	2	2	0	2	1	2	1	0	0	8	1	4
379	45	1	2	1	2	1	2	1	0	0	4	0	0				1	22
380	53	2	2	1	2	1	2	1	0	0	4	0	0				1	54
381	56	2	2	1	2	1	2	1	0	0	2	3	0
382	60	2	2	1	2	1	2	1	0	0	4	8	0
383	55	2	1	1	2	1	2	1	0	0	4	2	0	6	6	0
384	48	1	1	2	2	1	2	1	0	0	0	0	0
385	57	2	2	1	2	1	2	1	0	0	0	0	0
386	58	2	2	1	2	1	2	1	0	0	0	2	0
387	49	1	1	1	2	1	2	1	0	0	4	4	0
388	52	1	2	2	3	1	2	1	0	0	4	4	0
389	57	2	2	2	3	1	2	1	0	0	0	0	0
390	75	2	1	2	3	1	2	1	0	0	0	2	0
391	58	2	3	3	3	1	2	1	0	0	0	4	0
392	37	1	2	3	3	1	2	1	0	0	8	4	1	4	4	0
393	46	1	1	3	3	1	2	1	0	0	4	1	1
394	57	2	3	1	3	1	2	1	0	0	0	4	0
395	66	2	2	0	2	2	2	1	0	0	8	1	0	4	4	2
396	73	2	2	0	2	2	2	1	0	0	4	4	0
397	73	2	2	0	2	2	2	1	0	0	4	4	0
398	71	2	1	2	2	2	2	1	0	0	3	3	0
399	63	2	1	0	3	2	2	1	0	0	0	0	0				0	37
400	50	1	1	0	1	1	3	1	0	0	2	2	0
401	52	1	1	0	1	1	3	1	0	0	4	2	0	2	2	0	1	109
402	75	2	1	0	1	1	3	1	0	0	0	4	0
403	31	1	3	0	2	1	3	1	0	0	0	1	0
404	53	1	2	0	2	1	3	1	0	0	2	1	0	0	1	0	1	61
405	65	2	2	0	2	1	3	1	0	0	0	0	0				1	77
406	52	1	2	1	2	1	3	1	0	0	3	3	0	0	0	0	1	82
407	71	2	2	1	2	1	3	1	0	0	2	0	0	0	0	0	0	31
408	62	2	1	1	2	1	3	1	0	0	4	4	0
409	44	1	2	1	2	1	3	1	0	0	8	0	8
410	56	2	2	1	2	1	3	1	0	0	4	4	0
411	30	1	3	2	3	1	3	1	0	0	0	4	0
412	45	1	3	2	3	1	3	1	0	0	4	4	0
413	53	1	3	3	3	1	3	1	0	0	4	1	0
414	62	2	2	3	3	1	3	1	0	0	0	1	0
415	72	2	2	3	3	1	3	1	0	0	4	0	1	8	4	0
416	59	2	1	0	1	1	2	1	0	0	4	4	0	0	1	0
417	75	2	2	0	2	1	2	1	0	0	2	2	0	0	0	0
418	41	1	1	0	1	1	3	1	0	0	8	2	0
419	58	2	3	0	2	1	3	1	0	0	4	3	0	0	0	0
420	46	1	2	0	2	1	1	1	0	1	0	0	0
421	44	1	2	2	3	1	2	1	0	1	4	4	0	4	4	0
422	57	2	2	0	2	1	2	2	3	0	0	0	0
423	39	1	2	1	2	1	2	2	3	0	0	4	0
424	55	2	2	1	2	1	2	2	3	0	0	0	0
425	61	2	2	1	2	1	2	2	3	0	4	4	0
426	52	2	1	1	2	1	2	2	3	0	0	0	0
427	56	2	1	1	2	1	2	2	3	0	0	0	0
428	53	2	1	2	2	1	2	2	3	0	4	4	0
429	45	1	2	2	3	1	2	2	3	0	4	4	0				1	31
430	58	2	2	2	3	1	2	2	3	0	12	1	12
431	61	2	2	3	3	1	2	2	3	0	0	3	0
432	73	2	1	3	3	1	2	2	3	0	0	0	0
433	59	2	1	0	1	1	3	2	3	0	0	3	0
434	66	2	1	1	2	2	3	2	3	0	8	4	2
435	53	2	2	1	2	1	3	2	3	1	2	1	0	0	0	0	1	81
436	81	2	2	1	2	1	2	2	3	2	8	8	0
437	54	2	2	2	3	1	2	2	3	2	2	4	0
438	78	2	1	4	3	1	2	2	3	2	4	4	0
439	51	2	2	1	2	1	3	2	3	2	12	4	6
440	53	1	1	3	3	1	3	2	3	2	4	2	1
441	49	1	2	1	2	1	2	2	3	3	4	4	0
442	44	1	1	1	2	1	2	2	3	3	4	2	0
443	54	2	1	1	2	1	2	2	3	3	4	4	0
444	53	2	1	2	2	1	2	2	3	3	4	4	0
445	68	2	2	2	3	1	2	2	3	3	8	4	0
446	40	1	2	3	3	1	2	2	3	3	4	8	0
447	43	1	2	3	3	1	2	2	3	3	4	4	0
448	43	1	1	3	3	1	2	2	3	3	4	4	0
449	56	2	1	1	2	2	2	2	3	3	0	0	0
450	68	2	1	1	2	2	2	2	3	3	8	8	0
451	71	2	1	1	2	2	2	2	3	3	0	4	0
452	45	1	3	2	3	2	2	2	3	3	8	4	0
453	48	1	2	1	2	1	3	2	3	3	0	3	0
454	50	1	2	1	2	1	3	2	3	3	8	4	0
455	43	1	1	1	2	1	3	2	3	3	2	2	0
456	52	2	1	1	2	1	3	2	3	3	0	4	0
457	56	1	1	1	2	1	2	2	2	0	0	4	0
458	63	2	2	1	2	2	3	2	2	0	4	2	0	2	0	0
459	32	1	2	3	3	1	1	2	2	2	0	0	0
460	50	1	2	1	2	2	2	2	2	2	8	1	1	0	1	0	1	81
461	55	2	2	1	2	2	2	2	2	2	0	0	0	0	0	0
462	45	1	2	1	2	1	2	2	1	1	2	3	0	2	2	0	1	83
463	50	1	3	1	3	1	2	2	1	1	0	0	0
464	51	1	3	1	3	2	2	2	1	1	0	0	0
465	85	2	1	2	2	1	3	2	1	1	0	0	0	0	0	0
466	38	1	2	1	2	1	2	2	0	0	0	3	0
467	50	1	2	1	2	1	2	2	0	0	4	4	0
468	54	2	2	1	2	1	2	2	0	0	4	2	0				1	34
469	41	1	1	1	2	1	2	2	0	0	4	1	0	0	2	0	1	40
470	52	2	1	1	2	1	2	2	0	0	3	0	0	1	0	0	1	32
471	59	2	3	1	3	1	2	2	0	0	4	0	4
472	46	1	2	3	3	1	2	2	0	0	0	2	0
473	59	2	2	3	3	1	2	2	0	0	4	2	0	0	0	0	1	81
474	46	1	2	1	2	2	2	2	0	0	0	0	0				0	76
475	56	2	2	1	2	2	2	2	0	0	4	1	0	0	0	0
476	50	2	1	1	2	2	2	2	0	0	4	4	0
477	76	2	1	0	1	1	3	2	0	0	4	0	0	2	4	0
478	68	2	2	1	2	1	3	2	0	0	4	4	2
479	49	1	1	1	2	1	3	2	0	0	4	1	0
480	47	1	2	2	3	1	3	2	0	0	0	0	0
481	54	2	2	2	3	1	3	2	0	0	4	8	0
482	74	2	2	3	3	1	3	2	0	0	1	1	0				1	41
483	61	2	1	3	3	1	3	2	0	0	3	2	0	0	0	0	1	81
484	57	2	2	3	3	2	3	2	0	0	4	4	0
485	76	2	2	1	2	1	2	3	3	0	8	4	3
486	57	2	1	1	2	1	2	3	3	0	0	4	0
487	52	1	3	0	2	1	3	3	3	0	0	2	0
488	51	2	2	1	2	1	3	3	3	0	4	4	0				1	31
489	44	1	2	1	2	1	2	3	3	1	4	4	0
490	43	1	3	3	3	1	2	3	3	2	0	3	0
491	41	1	2	3	3	1	2	3	3	2	0	3	0
492	44	1	2	3	3	1	2	3	3	2	0	4	0
493	47	1	2	3	3	1	2	3	3	2	8	3	0				1	82
494	40	1	1	1	2	1	3	3	3	2	4	4	0
495	53	2	1	1	2	1	3	3	3	2	4	4	0	0	0	0	1	81
496	47	1	2	1	2	1	2	3	3	3	4	8	0
497	33	1	2	3	3	1	2	3	3	3	4	4	0
498	60	2	2	3	3	1	2	3	3	3	0	0	0
499	47	1	3	1	3	2	2	3	3	3	0	0	0
500	45	1	2	1	2	1	3	3	3	3	8	8	0
501	42	1	2	1	2	1	2	3	2	0	4	4	0
502	50	2	2	1	2	1	2	3	2	0	8	4	3
503	50	1	1	1	2	1	2	3	2	0	4	3	0	0	0	0	1	83
504	53	2	2	2	3	1	2	3	2	0	4	4	0	6	6	0	0	34
505	35	1	2	2	3	1	3	3	2	0	4	4	0				1	82
506	49	1	2	2	3	1	3	3	2	0	4	1	0
507	51	2	2	3	3	2	3	3	2	0	0	2	0
508	49	2	1	1	2	2	2	3	2	1	8	4	0
509	50	1	3	1	3	1	2	3	2	2	0	0	0
510	57	2	2	2	3	1	2	3	2	2	0	0	0
511	40	1	3	3	3	1	2	3	2	2	0	1	0
512	49	1	2	1	2	1	2	3	1	1	0	0	0
513	68	2	3	0	2	2	2	3	1	1	6	2	0
514	78	2	1	0	1	1	2	3	0	0	4	2	0
515	43	1	2	1	2	1	2	3	0	0	8	8	0
516	45	1	2	1	2	1	2	3	0	0	4	2	0
517	49	1	2	1	2	1	2	3	0	0	4	4	0
518	53	2	2	1	2	1	2	3	0	0	0	4	0
519	57	2	2	1	2	1	2	3	0	0	4	4	0
520	63	2	2	1	2	1	2	3	0	0	12	6	4
521	72	2	2	1	2	1	2	3	0	0	4	2	0	0	0	0	1	81
522	75	2	2	1	2	1	2	3	0	0	3	4	0
523	77	2	2	1	2	1	2	3	0	0	0	3	0
524	46	1	1	1	2	1	2	3	0	0	4	1	0
525	52	1	1	1	2	1	2	3	0	0	4	4	0
526	53	1	1	1	2	1	2	3	0	0	2	2	0
527	54	2	1	1	2	1	2	3	0	0	4	4	0
528	56	2	1	1	2	1	2	3	0	0	0	1	0	0	0	0	0	39
529	62	2	1	1	2	1	2	3	0	0	2	0	1
530	80	2	1	1	2	1	2	3	0	0	4	4	0
531	49	1	3	1	3	1	2	3	0	0	0	4	0
532	50	2	3	2	3	1	2	3	0	0	8	4	0
533	53	2	2	2	3	1	2	3	0	0	4	4	0
534	62	2	2	2	3	1	2	3	0	0	8	4	0	2	0	0	0	33
535	77	2	2	2	3	1	2	3	0	0	0	3	0
536	50	1	3	3	3	1	2	3	0	0	8	0	0
537	47	1	2	3	3	1	2	3	0	0	4	4	0
538	49	2	2	3	3	1	2	3	0	0	4	4	0				1	30
539	52	2	2	3	3	1	2	3	0	0	8	8	0
540	55	2	2	3	3	1	2	3	0	0	0	3	0
541	70	2	2	3	3	1	2	3	0	0	0	0	0
542	54	2	2	1	2	2	2	3	0	0	12	1	6	2	0	0	1	81
543	58	2	2	1	2	2	2	3	0	0	8	8	0
544	43	1	3	1	3	2	2	3	0	0	8	4	0
545	45	1	3	1	3	2	2	3	0	0	4	2	0				1	31
546	57	2	2	3	3	2	2	3	0	0	4	4	0
547	53	2	2	1	2	1	3	3	0	0	8	3	0	8	1	0	0	37
548	54	2	2	1	2	1	3	3	0	0	1	2	0				1	81
549	56	2	2	1	2	1	3	3	0	0	0	8	0
550	44	1	1	1	2	1	3	3	0	0	0	0	0
551	79	2	1	2	2	1	3	3	0	0	0	4	0
552	57	2	3	2	3	1	3	3	0	0	0	4	0
553	68	2	1	4	3	1	3	3	0	0	4	3	0
554	45	1	2	1	2	2	3	3	0	0	4	2	0	0	0	0	1	81
555	50	1	2	1	2	2	3	3	0	0	4	1	3
556	52	1	2	1	2	2	3	3	0	0	8	8	0
557	60	2	2	2	3	1	3	3	0	2	8	8	0
558	77	2	1	2	3	1	1	0	2	2	4	2	0	0	1	0
559	45	1	2	0	2	1	1	1	3	2	4	3	0
560	64	2	2	0	2	1	1	1	2	1	4	0	0	0	0	0
561	69	2	1	0	1	1	1	1	1	1	4	4	0
562	75	2	2	0	2	1	1	2	0	0	8	3	0	0	1	0
